# Supplementary material
Source: HighWire-hosted journal article supplement (https://srh.bmj.com/highwire/filestream/141304/field_highwire_adjunct_files/1/bmjsrh-2020-200658supp002_data_supplement.pdf)
Supplement: bmjsrh-2020-200658supp002_data_supplement.pdf [file bmjsrh-2020-200658supp002_data_supplement.pdf]

**Supplementary table 1.** Demographic, reproductive and clinical variables among women from the two included sub-studies. Data presented as n (%) or median (interquartile range).

|                                                 | Substudy 1 <sup>a</sup> (n = 118) | Substudy 2 <sup>b</sup> (n = 184) | p     |
|-------------------------------------------------|-----------------------------------|-----------------------------------|-------|
| Age                                             |                                   |                                   | 0.001 |
| < 20 years, n (%)                               | 1 (0.8)                           | 15 (8.2)                          |       |
| 20-24 years, n (%)                              | 50 (42.4)                         | 82 (44.6)                         |       |
| 25-29 years, n (%)                              | 60 (50.8)                         | 62 (33.7)                         |       |
| >30 years, n (%)                                | 7 (5.9)                           | 25 (13.6)                         |       |
| Parous, n (%)                                   | 6 (5.1)                           | 18 (9.8)                          | 0.141 |
| Induced abortion, n (%)                         | 10 (8.5)                          | 27 (14.7)                         | 0.109 |
| Repeated induced abortion, n (%)                | 3 (2.5)                           | 9 (4.9)                           | 0.378 |
| BMI                                             |                                   |                                   | 0.906 |
| <18.5 kg/m <sup>2</sup> , n (%)                 | 9 (7.6)                           | 12 (6.5)                          |       |
| 18.5 – 24.99 kg/m <sup>2</sup> , n (%)          | 97 (82.2)                         | 149 (81)                          |       |
| 25.0 – 29.99 kg/m <sup>2</sup> , n (%)          | 10 (8.5)                          | 20 (10.9)                         |       |
| >30 kg/m <sup>2</sup> , n (%)                   | 2 (1.7)                           | 3 (1.6)                           |       |
| Smoking, n (%)                                  | 9 (7.6)                           | 14 (7.8)                          | 0.962 |
| Educational years, mean ± SD                    | 14.94 ± 2.1                       | 14.81 ± 2.2                       | 0.604 |
| Age of start of contraceptive use, median (IQR) | -                                 | 16 (15 -18)                       |       |
| Duration of HC use, months, mean ± SD           | 40 ± 35                           | 55 ± 41                           | 0.008 |
| Previous use of more than 2 CHCs, n (%)         | 20 (16.9)                         | 25 (13.6)                         | 0.423 |
| Previous use of LNG-containing pill, n (%)      | 96 (81.4)                         | 121 (65.8)                        | 0.003 |
| Previous use of anti-androgenic pill, n (%)     | 51 (43.2)                         | 59 (32.1)                         | 0.049 |
| Migraine, n (%)                                 | 12 (10.2)                         | 5 (2.7)                           | 0.006 |
| Dysmenorrhea or endometriosis, n (%)            | 21 (17.8)                         | 25 (13.6)                         | 0.321 |

<sup>a</sup> = the cross-sectional study, carried out in 2007. <sup>b</sup> = the randomised controlled trial, carried out in 2013-2015.

Percentages given in relation to available responses, missing values in 1.0 – 2.6% of cases. BMI = Body Mass Index; CHC = Combined hormonal contraceptive; CI = confidence interval; HC = hormonal contraceptive; IQR = interquartile range; LNG = levonorgestrel; SD = standard deviation.

Anti-androgenic pills contain either drospirenone, cyproterone acetate or desogestrel.

P-values according to chi-square test or, in case of less than five values, Fisher's Exact test.
